# Supplementary material for: Microsatellite Markers Determine the Genetic Structure and Diversity of Landraces of Quinoa from Ayacucho, Peru
Source: Preprints.org preprint supplement (doi:10.20944/preprints202409.1730.v1), 2024-09-23
Supplement: Supplementary file 1 [file supplementary]

## Sheet: Table S1
Table S1. Quinoa germplasm (105) examined in this study.
No	Code	Common name	Province	District	Village	Altitude (masl)	Population	N° Alleles
1	C100	Quinua	Cangallo	Cangallo	Cangallo	2570	Cluster 2	15
2	C186	Ojo de gallo	Cangallo	Pampa cangallo	Sachabamba	2761	Cluster 3	13
3	C187	Yuraq quinua Ayacucho	Cangallo	Pampa cangallo	Manallasaq	3512	Cluster 3	14
4	C34	Quinua	Cangallo	Chuschi	Chuschi	2570	Cluster 1	20
5	C68	Quinua	Cangallo	Hualllabamba	Hualllabamba	2570	Cluster 2	12
6	C69	Quinua	Cangallo	Hualllabamba	Hualllabamba	2570	Cluster 2	13
7	C87	Quinua	Cangallo	Nueva esperanza	Nueva esperanza	2570	Cluster 2	24
8	H203	Yuraq quinua Ayacuchana	Huanta	Ayacucho	Ccollana	2495	Cluster 3	11
9	H204	Yuraq choclito	Huanta	Ayacucho	Ccollana	2495	Cluster 3	16
10	H205	Puca quinua	Huanta	Ayacucho	Ccollana	2495	Cluster 3	21
11	H28	Quinua	Huanta	Huanta	Huanta	3422	Cluster 1	22
12	H36	Quinua	Huanta	Huanta	Huanta	2642	Cluster 1	18
13	Ha10	Quinua	Huamanga	Huamanga	Huamanga	2761	Cluster 1	12
14	Ha13	Quinua	Huamanga	Ccecelambras	Ccecelambras	2761	Cluster 1	16
15	Ha14	Quinua	Huamanga	Chontaca	Chontaca	2761	Cluster 1	13
16	Ha15	Quinua	Huamanga	Huamanguilla	Huamanguilla	2761	Cluster 1	14
17	Ha189	Yuraq quinua (nativa)	Huamanga	Carmen alto	Tambo puquio	3707	Cluster 3	18
18	Ha190	Qello quinua	Huamanga	Carmen alto	Tambo puquio	3707	Cluster 3	13
19	Ha191	Yuraq quinua nativa	Huamanga	Quinua	Quinua	1186	Cluster 3	10
20	Ha192	Yana ccoito	Huamanga	Carmen alto	Casa orcco	2803	Cluster 3	15
21	Ha193	Inía Salcedo (choclo)	Huamanga	Carmen alto	Casa orcco	2803	Cluster 3	8
22	Ha194	Real Boliviana	Huamanga	Carmen alto	Carmen alto	2803	Cluster 3	6
23	Ha195	Puca Pasancaya	Huamanga	Carmen alto	Carmen alto	2803	Cluster 3	14
24	Ha196	Yuraq quinua July	Huamanga	Carmen alto	Casa orcco	2803	Cluster 3	15
25	Ha197	Yuraq salcedo Arequipeño	Huamanga	Chiara	Chiara	3539	Cluster 3	19
26	Ha198	Qello quinua Marangani	Huamanga	Ayacucho	Huamanga	2761	Cluster 3	8
27	Ha199	Yuraq quinua Junín	Huamanga	Ayacucho	Huamanga	2761	Cluster 3	14
28	Ha20	Quinua	Huamanga	Huamanga	Huamanga	2761	Cluster 1	14
29	Ha200	Choclito	Huamanga	Ayacucho	Huamanga	2761	Cluster 3	11
30	Ha201	Puca Pasancalla	Huamanga	Ayacucho	Huamanga	2761	Cluster 3	10
31	Ha202	Salcedo Inía	Huamanga	Ayacucho	Huamanga	2761	Cluster 3	12
32	Ha206	Yana ccoito	Huamanga	Ayacucho	Ccecchqa	3637	Cluster 3	8
33	Ha207	Yuraq choclito	Huamanga	Acocro	Acocro	3265	Cluster 3	17
34	Ha21	Quinua	Huamanga	Huamanga	Acocro	2761	Cluster 1	14
35	Ha24	Quinua	Huamanga	Huamanga	Acocro	2761	Cluster 1	16
36	Ha30	Quinua	Huamanga	Huamanga	Acocro	2761	Cluster 1	15
37	Ha43	Quinua	Huamanga	Vinchos	Vinchos	2761	Cluster 1	11
38	Ha56	Quinua	Huamanga	Circamarca	Circamarca	2761	Cluster 1	16
39	Ha58	Quinua	Huamanga	Vinchos	Rosaspata	2761	Cluster 1	12
40	Ha62	Quinua	Huamanga	Acocro	Acocro	2761	Cluster 2	13
41	Ha67	Quinua	Huamanga	Iguain	Macachacra	2761	Cluster 2	15
42	Ha70	Quinua	Huamanga	Huamanguilla	Huamanguilla	2761	Cluster 2	16
43	Ha72	Quinua	Huamanga	Vinchos	Vinchos	2761	Cluster 2	16
44	Ha76	Quinua	Huamanga	Ccecelambras	Ccecelambras	2761	Cluster 2	19
45	Ha77	Quinua	Huamanga	Lambarspuquio	Lambarspuquio	2761	Cluster 2	16
46	Ha81	Quinua	Huamanga	Paqcha	Paqcha	2761	Cluster 2	13
47	Ha82	Quinua	Huamanga	Socos	Ampuqasa	2761	Cluster 2	16
48	Ha85	Quinua	Huamanga	Ccecelambras	Ccecelambras	2761	Cluster 2	17
49	Ha94	Quinua	Huamanga	Huamanga	Huamanga	2761	Cluster 2	17
50	Ha96	Quinua	Huamanga	Huamanga	Huamanga	2761	Cluster 2	17
51	HS16	Quinua	Huancasancos	Huancasancos	Huancasancos	3422	Cluster 1	16
52	HS98	Quinua	Huancasancos	Huancasancos	Huancasancos	3422	Cluster 2	14
53	L101	Quinua	Lucanas	Puquio	Puquio	3214	Cluster 2	12
54	L102	Quinua	Lucanas	Puquio	Puquio	3214	Cluster 2	13
55	L115	Quinua	Lucanas	Puquio	Puquio	3214	Cluster 2	20
56	L116	Quinua	Lucanas	Puquio	Puquio	3214	Cluster 2	16
57	L117	Quinua	Lucanas	Puquio	Puquio	3214	Cluster 2	25
58	L118	Quinua	Lucanas	Puquio	Puquio	3214	Cluster 2	18
59	L119	Quinua	Lucanas	Puquio	Puquio	3214	Cluster 2	21
60	L120	Quinua	Lucanas	Puquio	Puquio	3214	Cluster 2	19
61	L122	Quinua	Lucanas	Puquio	Puquio	3214	Cluster 2	14
62	LM26	Quinua	La Mar	Tambo	Tambo	3499	Cluster 1	14
63	LM31	Quinua	La Mar	Tambo	Tambo	3499	Cluster 1	12
64	LM54	Quinua	La Mar	San miguel	Parihuanca	3499	Cluster 1	15
65	LM55	Quinua	La Mar	San miguel	Parihuanca	3499	Cluster 1	15
66	LM64	Quinua	La Mar	Anco	Anco	3499	Cluster 2	19
67	P123	Quinua	Parinacochas	Parinacochas	Parinacochas	3178	Cluster 2	18
68	P124	Quinua	Parinacochas	Coracora	Coracora	3178	Cluster 2	18
69	P125	Quinua	Parinacochas	Parinacochas	Parinacochas	3178	Cluster 2	17
70	P126	Quinua	Parinacochas	Parinacochas	Parinacochas	3178	Cluster 2	18
71	P127	Quinua	Parinacochas	Coracora	Coracora	3178	Cluster 2	16
72	P128	Quinua	Parinacochas	Coracora	Coracora	3178	Cluster 2	15
73	Ps46	Quinua	Paucar del Sara Sara	San jose ushua	San jose ushua	2761	Cluster 1	12
74	Ps47	Quinua	Paucar del Sara Sara	San jose ushua	San jose ushua	2761	Cluster 1	16
75	Ps48	Quinua	Paucar del Sara Sara	Corculla	Corculla	2761	Cluster 1	13
76	Ps49	Quinua	Paucar del Sara Sara	Corculla	Corculla	2761	Cluster 1	17
77	Ps50	Quinua	Paucar del Sara Sara	Oyolo	Oyolo	2761	Cluster 1	17
78	Ps51	Quinua	Paucar del Sara Sara	Oyolo	Oyolo	2761	Cluster 1	14
79	Ps52	Quinua	Paucar del Sara Sara	Oyolo	Oyolo	2761	Cluster 1	17
80	S2	Quinua	Sucre	Chalcos	Corralpata	3649	Cluster 1	12
81	S22	Quinua	Sucre	Chalcos	Ayalca	3649	Cluster 1	17
82	S3	Quinua	Sucre	Chalcos	Ayalca	3649	Cluster 1	13
83	S32	Quinua	Sucre	Chalcos	Ayalca	3649	Cluster 1	13
84	S33	Quinua	Sucre	Chalcos	Corralpata	3649	Cluster 1	13
85	S39	Quinua	Sucre	Querobamba	Querobamba	3508	Cluster 1	19
86	S45	Quinua	Sucre	Chalcos	Ayalca	3649	Cluster 1	17
87	S5	Quinua	Sucre	Chilcayoc	Chilcayoc	3410	Cluster 1	7
88	S6	Quinua	Sucre	Chalcos	Chalcos	3649	Cluster 1	14
89	S7	Quinua	Sucre	Chilcayoc	Chilcayoc	3410	Cluster 1	21
90	S71	Quinua	Sucre	Chalcos	Ankara	3649	Cluster 2	16
91	S75	Quinua	Sucre	Querobamba	Potongo	3508	Cluster 2	18
92	S8	AtoqpaQuinua	Sucre	Chilcayoc	Jatun rumi	3410	Cluster 1	11
93	S83	Quinua	Sucre	Chilcayocc	Chilcayocc	3410	Cluster 2	22
94	S88	Quinua	Sucre	Chalcos	Ayalca	3649	Cluster 2	16
95	S9	Quinua	Sucre	Chilcayoc	Jatun rumi	3410	Cluster 1	12
96	S92	Quinua	Sucre	Querobamba	Querobamba	3508	Cluster 2	19
97	V188	Yuraq quinua Junín	Vilcashuaman	Vischongo	Vischongo	3148	Cluster 3	8
98	V59	Quinua	Vilcashuaman	Carhuanca	Carhuanca	3470	Cluster 2	14
99	V60	Quinua	Vilcashuaman	Carhuanca	Carhuanca	3470	Cluster 2	15
100	V61	Quinua	Vilcashuaman	Carhuanca	Carhuanca	3470	Cluster 2	17
101	V86	Quinua	Vilcashuaman	Millpo	Millpo	3470	Cluster 2	14
102	VF41	Quinua	Victor Fajardo	Victor fajardo	Victor fajardo	3102	Cluster 1	14
103	VF73	Quinua	Victor Fajardo	Huancapi	Huancapi	3102	Cluster 2	18
104	VF78	Quinua	Victor Fajardo	Victor fajardo	Victor fajardo	3102	Cluster 2	17
105	VF79	Quinua	Victor Fajardo	Apongo	Apongo	3102	Cluster 2	24
