# Supplementary figures and images for: Microsatellite Markers Determine the Genetic Structure and Diversity of Landraces of Quinoa from Ayacucho, Peru
Source: Preprints.org preprint supplement (doi:10.20944/preprints202409.1730.v1), 2024-09-23

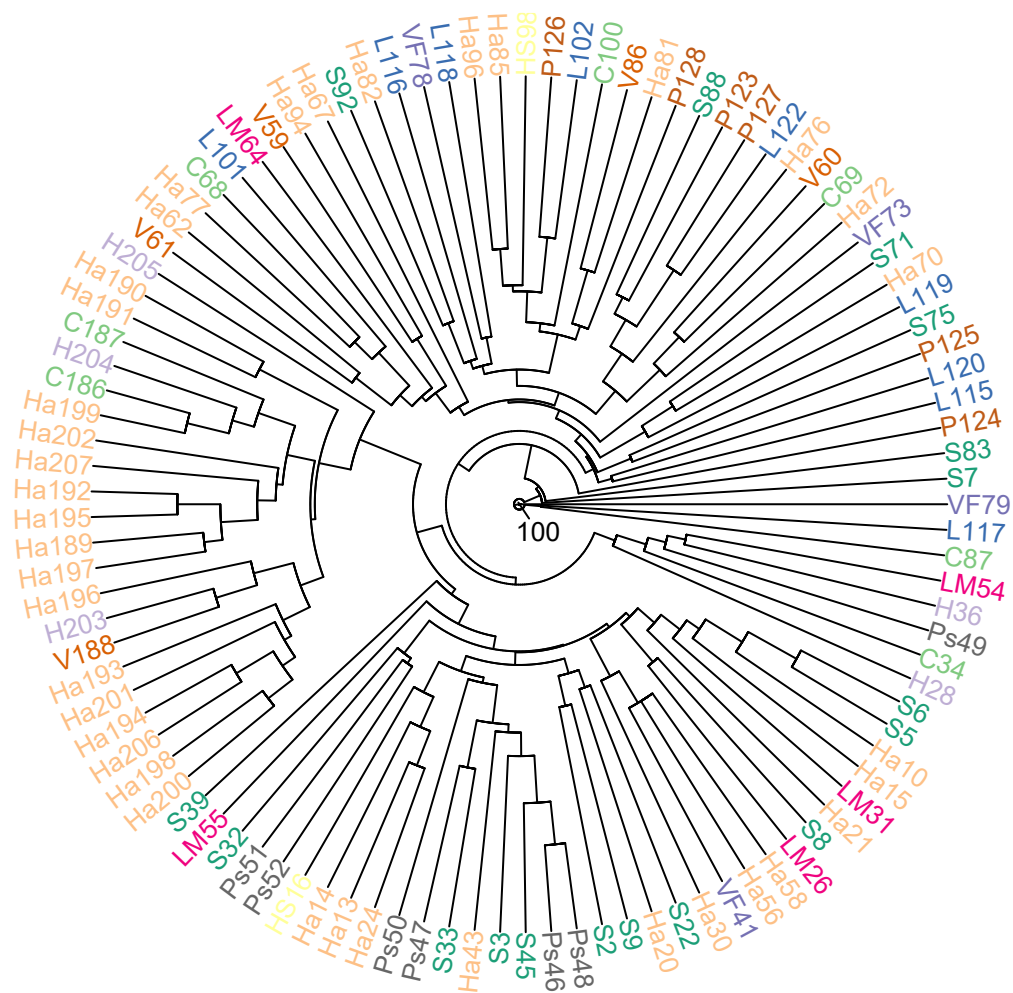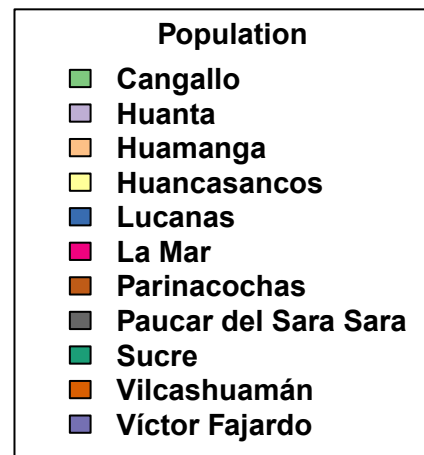

Supplement: Supplementary file 1 [file supplementary]

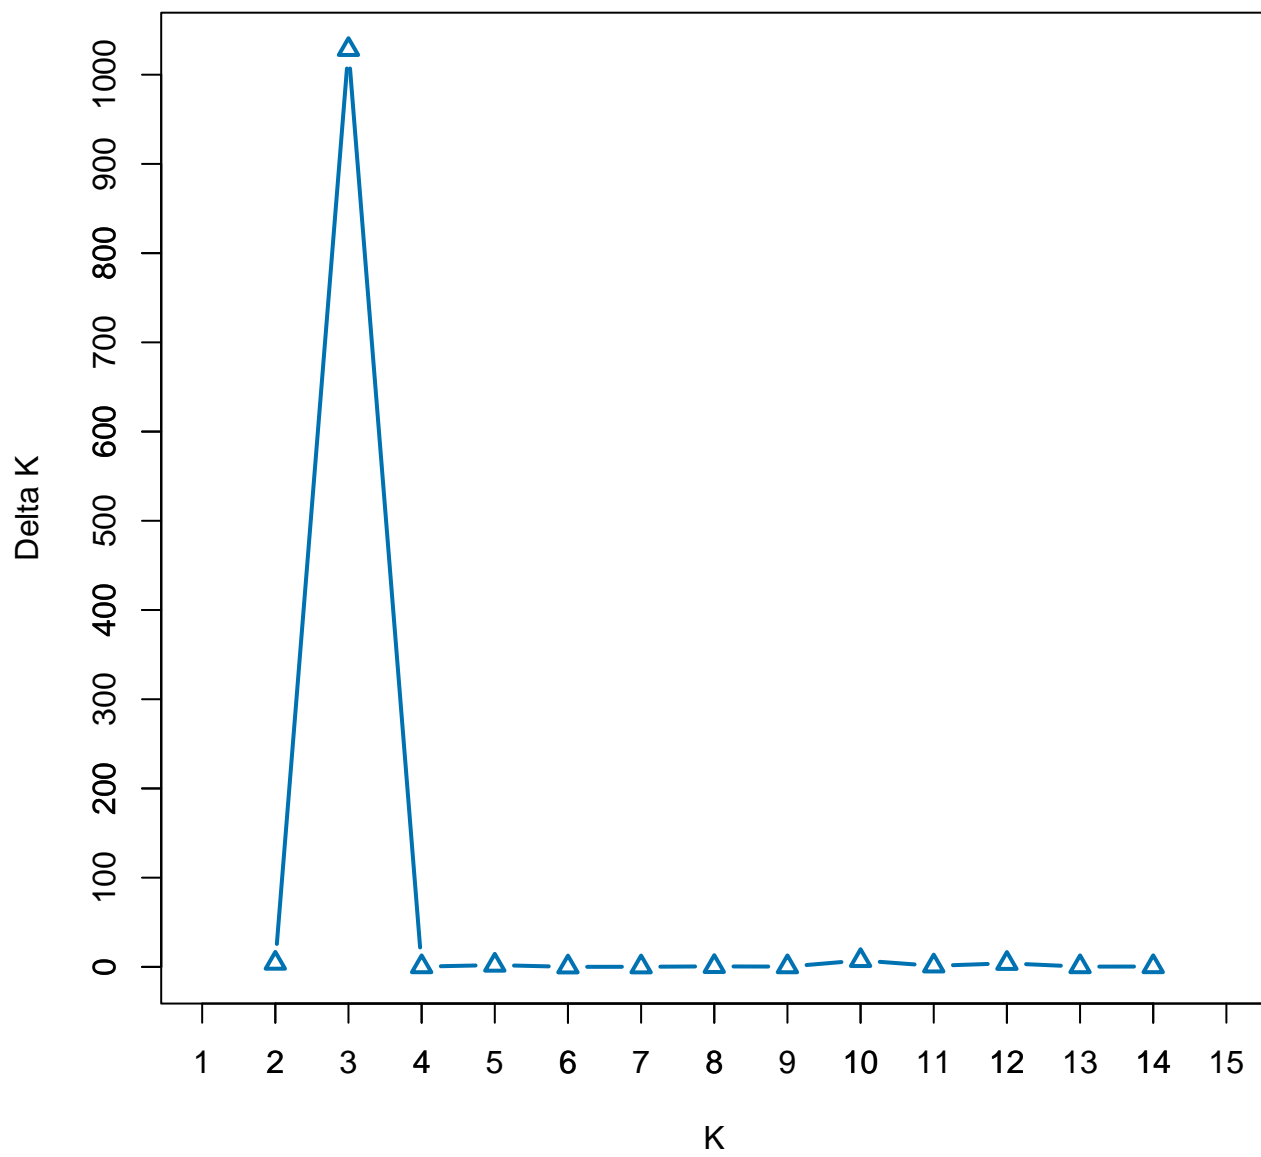

Supplement: Supplementary file 2 [file supplementary]

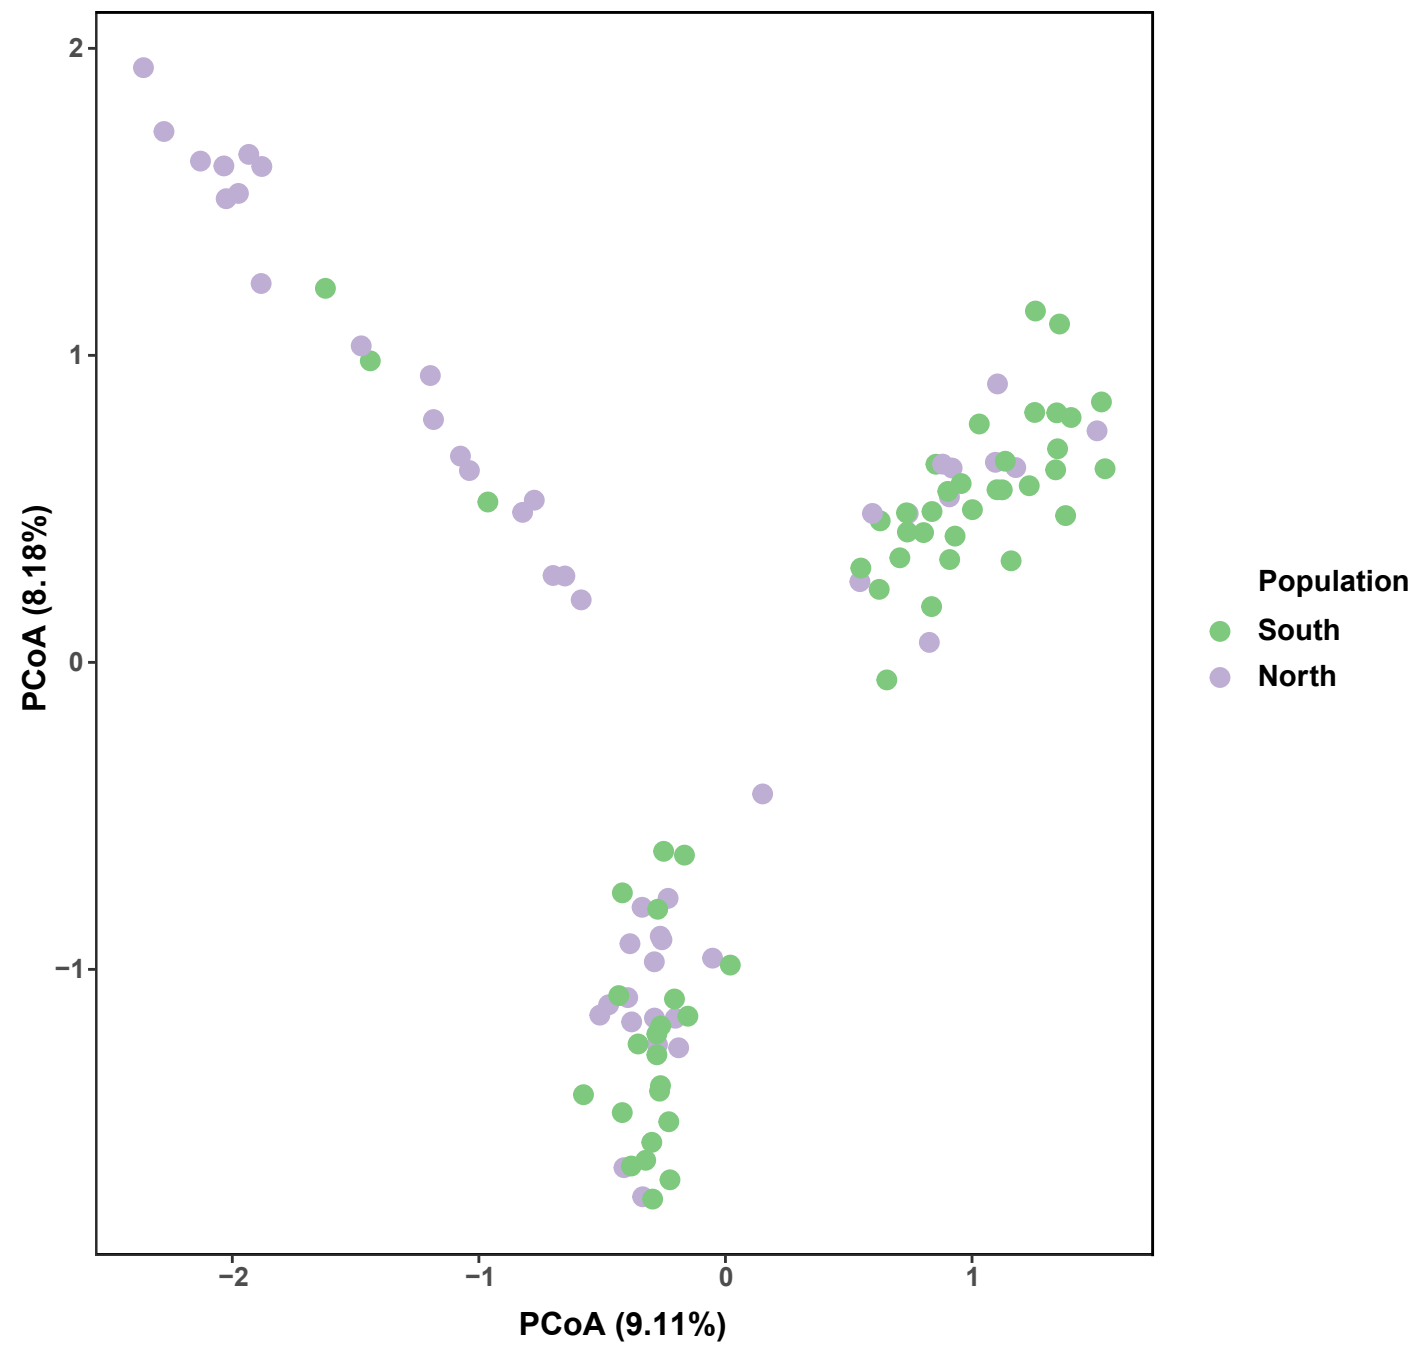

Supplement: Supplementary file 3 [file supplementary]
